# Supplementary material for: Deacylation studies on furanose triesters using an immobilized lipase: Synthesis of a key precursor for bicyclonucleosides
Source: Royal Society of Chemistry journal article supplement (doi:10.1039/b618426j), 2007-01-01
Supplement: b618426j.pdf [file b618426j.pdf]

SUPPORTING INFORMATION

**Deacylation Studies on Furanose Triesters Using an Immobilized Lipase: Synthesis of a Key Precursor for Bicyclonucleosides**

Ashok K. Prasad,<sup>a,\*</sup> Neerja Kalra,<sup>a,b</sup> Yogesh Yadav,<sup>a</sup> Rajesh Kumar,<sup>a</sup> Sunil K. Sharma,<sup>a</sup> Shamkant Patkar,<sup>c</sup> Lene Lange,<sup>c</sup> Jesper Wengel<sup>b,\*</sup> and Virinder S. Parmar<sup>a,\*</sup>

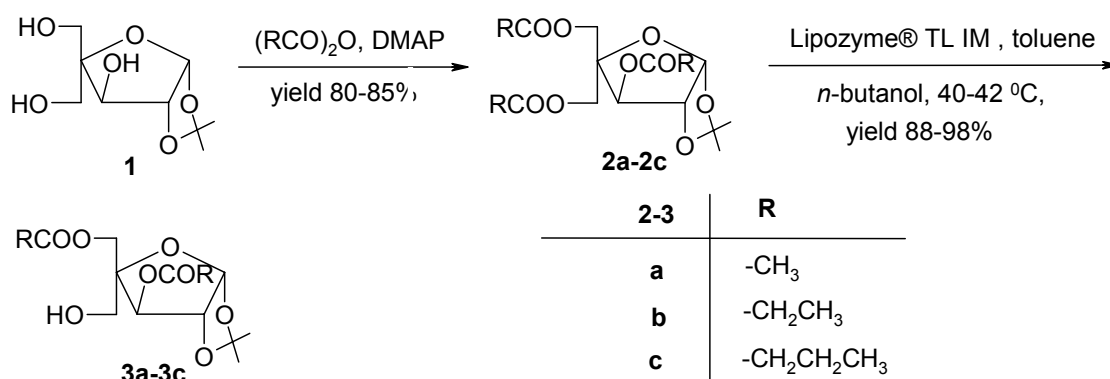

**General procedure for acylation of 4-C-hydroxymethyl-1,2-O-(1-methylethylidene)- $\beta$ -L-threo-pentofuranose (1); Preparation of triesters 2a-2c:** To a mixture of 4-C-hydroxymethyl-1,2-O-(1-methylethylidene)- $\beta$ -L-threo-pentofuranose (**1**) and the corresponding acid anhydride (acetic/propanoic/butanoic anhydride, 3.3 equiv.) was added catalytic amount of DMAP and the reaction mixture was stirred for 4-5 h at 28 °C. On completion (analytical TLC), the reaction mixture was poured over ice water and the product triester was extracted with ethyl acetate (2 x 60 ml). The combined organic extract was washed with saturated aqueous NaHCO<sub>3</sub> (50 ml), dried over anhydrous Na<sub>2</sub>SO<sub>4</sub>, and the solvent was removed under reduced pressure. The residue thus obtained was purified by column chromatography on silica gel using 25 % ethyl acetate in petroleum ether (v/v) as eluent to afford the triacylated products **2a-2c** in 80-85 % yields.

Supplementary Material (ESI) for Chemical Communications  
This journal is (c) The Royal Society of Chemistry 2007

**General procedure for lipase-catalyzed selective deacylation of 4-*C*-acyloxymethyl-3,5-di-*O*-acyl-1,2-*O*-(1-methylethylidene)- $\beta$ -L-*threo*-pentofuranose (2a-2c):** To a solution of the triacylated furanose **2a-2c** (3.0 mM) in anhydrous toluene (30 ml) was added *n*-butanol (1.2 equiv), followed by the addition of Lipozyme® TL IM immobilized on silica (500 mg). The reaction mixture was stirred with shaking at 40-42 °C in an incubator and the progress of the reaction monitored periodically by TLC. On completion, the reaction was quenched by filtering off the lipase, the solvent was removed under reduced pressure, and the residue was purified by column chromatography on silica gel using 40-50 % ethyl acetate in petroleum ether (v/v) as eluent to afford the deacylated products **3a-3c** in 88-98 % yields.

PDF files of <sup>1</sup>H NMR and <sup>13</sup>C NMR of compounds **2a – 2c** and **3a - 3c** are attached herewith (12 PDF files).
